# Supplementary material for: Leucocytes are a major source of circulating nicotinamide phosphoribosyltransferase (NAMPT)/pre-B cell colony (PBEF)/visfatin linking obesity and inflammation in humans
Source: PubMed Central journal article supplement — Diabetologia. 2011 Feb 6;54(5):1200–11. doi: 10.1007/s00125-010-2042-z (PMC3071946; doi:10.1007/s00125-010-2042-z), 2011-02-06
Supplement: 125_2010_2042_MOESM1_ESM.pdf [file 125_2010_2042_MOESM1_ESM.pdf]

## Electronic supplementary material

**ESM Table 1** Cohort characteristics of the normal lean cohort

(Leipzig Schoolchildren project)

| <b>Variable</b>          | <b>Mean±SD</b> | <b>Range (min–max)</b> |
|--------------------------|----------------|------------------------|
| Age (years)              | 12.70±2.59     | 7.95–17.92             |
| BMI (kg/m <sup>2</sup> ) | 18.82±2.42     | 14.49–25.42            |
| BMI SDS                  | 0.00±0.79      | –2.06–1.58             |
| Height SDS               | 0.10±0.84      | –1.82–2.72             |
| IGFI (ng/ml)             | 372.6±162.1    | 71–888                 |
| DHEA-S (nmol/l)          | 4.21±3.34      | 0.30–18.1              |
| Oestradiol (pg/ml)       | 151.2±166.6    | 41.6–1124              |
| Testosterone (nmol/l)    | 8.26±7.82      | 0–26.2                 |
| Leptin (ng/ml)           | 6.16±6.18      | 0.40–44.00             |
| WHR                      | 0.80±0.05      | 0.67–0.92              |

Data are given for  $n=138$  healthy lean children (71 boys, 67 girls) as mean±SD
