# Supplementary material for: Leucocytes are a major source of circulating nicotinamide phosphoribosyltransferase (NAMPT)/pre-B cell colony (PBEF)/visfatin linking obesity and inflammation in humans
Source: PubMed Central journal article supplement — Diabetologia. 2011 Feb 6;54(5):1200–11. doi: 10.1007/s00125-010-2042-z (PMC3071946; doi:10.1007/s00125-010-2042-z), 2011-02-06
Supplement: 125_2010_2042_MOESM2_ESM.pdf [file 125_2010_2042_MOESM2_ESM.pdf]

## Electronic supplementary material

**ESM Table 2** Cohort characteristics of lean and obese children of the Leipzig Childhood Atherobesity cohort

| Variable                 | Lean (n=70) | Range      | Obese (n=86) | Range      | p value            |
|--------------------------|-------------|------------|--------------|------------|--------------------|
| Male/female              | 28/42       |            | 42/44        |            | 0.270 <sup>a</sup> |
| Age (years)              | 13.0±3.0    | 7.5–18.8   | 12.2±2.9     | 6.1–17.9   | 0.089              |
| Pubertal stage (PH)      | 3.0±1.7     | 1–5        | 2.8±1.8      | 1–5        | 0.498              |
| BMI SDS                  | −0.26±0.76  | −1.97–1.23 | 2.32±0.50    | 1.30–3.68  | <0.0001            |
| BMI (kg/m <sup>2</sup> ) | 18.4±2.7    | 13.8–24.3  | 28.3±4.6     | 19.9–45.1  | <0.0001            |
| Height SDS               | −0.03±1.01  | −2.61–2.45 | 0.72±1.18    | −2.81–3.58 | <0.0001            |
| Waist (cm)               | 64.3±8.2    | 51–89      | 86.0±10.0    | 66–111     | <0.0001            |
| Hip (cm)                 | 79.0±11.6   | 57–107     | 99.3±13.0    | 69–138     | <0.0001            |
| WHR                      | 0.82±0.06   | 0.67–0.95  | 0.87±0.06    | 0.74–1.05  | <0.0001            |
| Skinfold thickness (mm)  | 10.9±3.7    | 5–21       | 24.4±6.2     | 9–43       | <0.0001            |
| Leptin (ng/ml)           | 6.31±5.91   | 0.1–29.1   | 29.4±17.0    | 8.1–86.6   | <0.0001            |

Data are given as mean±SD. Statistical significance was determined by Student's *t* test

<sup>a</sup>Statistical significance was determined by  $\chi^2$  test

For skinfold thickness, the skinfold thickness of triceps is given exemplary
