# Supplementary material for: Leucocytes are a major source of circulating nicotinamide phosphoribosyltransferase (NAMPT)/pre-B cell colony (PBEF)/visfatin linking obesity and inflammation in humans
Source: PubMed Central journal article supplement — Diabetologia. 2011 Feb 6;54(5):1200–11. doi: 10.1007/s00125-010-2042-z (PMC3071946; doi:10.1007/s00125-010-2042-z), 2011-02-06
Supplement: 125_2010_2042_MOESM3_ESM.pdf [file 125_2010_2042_MOESM3_ESM.pdf]

## Electronic supplementary material

ESM Table 3 Cohort characteristics of intervention cohorts

| Variable                                           | Basal<br>(mean±SD) | Post<br>(mean±SD) | Difference<br>(mean±SD) | <i>p</i> value |
|----------------------------------------------------|--------------------|-------------------|-------------------------|----------------|
| Lifestyle Intervention 'Obeldicks' ( <i>n</i> =36) |                    |                   |                         |                |
| Age (years)                                        | 10.0±2.3           | 11.1±2.3          | 1.2±0.05                | <0.0001        |
| BMI (kg/m <sup>2</sup> )                           | 25.9±2.8           | 24.8±3.3          | -1.15±0.26              | <0.0001        |
| BMI SDS                                            | 2.29±0.40          | 1.88±0.52         | -0.40±0.05              | <0.0001        |
| Weight (kg)                                        | 56.7±15.7          | 60.3±17.3         | 3.6±0.7                 | <0.0001        |
| HOMA-IR                                            | 3.41±2.03          | 2.94±1.30         | -0.38±0.29              | 0.091          |
| hsCrP (ng/ml)                                      | 1.20±0.99          | 0.74±0.96         | -0.41±1.15              | 0.036          |
| Bariatric surgery ( <i>n</i> =14)                  |                    |                   |                         |                |
| Age (years)                                        | 33.6±15.0          |                   |                         |                |
| BMI (kg/m <sup>2</sup> )                           | 49.1±6.9           | 38.3±4.94         | -10.8±7.1               | <0.0001        |
| Weight (kg)                                        | 141.0±19.2         | 110.1±17.4        | -30.8±18.7              | <0.0001        |
| HOMA-IR                                            | 6.78±3.2           | 3.73±1.23         | -3.50±1.64              | <0.0001        |
| hsCrP                                              | 4.19±1.46          | 1.35±0.96         | -2.84±1.91              | 0.0006         |
| Acute exercise ( <i>n</i> =15)                     |                    |                   |                         |                |
| Age (years)                                        | 28.4±1.9           |                   |                         |                |
| BMI (kg/m <sup>2</sup> )                           | 27.6±1.7           | 26.0±1.6          | -1.6±0.4                | <0.0001        |
| Weight (kg)                                        | 93.0±6.7           | 87.5±5.7          | -5.5±1.5                | <0.0001        |
| HOMA-IR                                            | 1.00±0.43          | 0.73±0.34         | -0.27±0.30              | 0.003          |
| hsCrP (ng/ml)                                      | 1.09±0.38          | 0.79±0.43         | -0.29±0.31              | 0.002          |

Data are given as mean±SD. Statistical significance was determined by paired *t* test
