# Supplementary material for: Leucocytes are a major source of circulating nicotinamide phosphoribosyltransferase (NAMPT)/pre-B cell colony (PBEF)/visfatin linking obesity and inflammation in humans
Source: PubMed Central journal article supplement — Diabetologia. 2011 Feb 6;54(5):1200–11. doi: 10.1007/s00125-010-2042-z (PMC3071946; doi:10.1007/s00125-010-2042-z), 2011-02-06
Supplement: 125_2010_2042_MOESM7_ESM.pdf [file 125_2010_2042_MOESM7_ESM.pdf]

## **Electronic supplementary material**

### **Methods**

#### ***Cohort and patient characteristics***

Inclusion and exclusion criteria for respective cohorts:

*Leipzig Schoolchildren cohort:* representative cohort of urban central German paediatric population  $n=2,675$ ; inclusion criteria for subsample: healthy, lean children, free of medications, free of co-morbidities; children were selected and stratified for sex and pubertal stage.

*Leipzig Atherobesity Childhood cohort:* inclusion criteria: healthy children, aged 7 to 18 years, free of medications, free of co-morbidities, no weight reduction within past 6 months.

*Lifestyle intervention cohort:* inclusion criteria: Age 8 to 16 years, BMI >97th centile, free of medications, free of co-morbidities. Children with endocrine disorders, familial hyperlipidaemia or syndromal obesity were excluded from the study.

*Bariatric surgery intervention cohort:* Individuals fulfilled the following inclusion criteria: (1) absence of any acute or chronic inflammatory disease as determined by a leucocyte count  $>7,000$  Gpt/l, C-reactive protein (CrP)  $>5.0$  mg/dl or clinical signs of infection; (2) undetectable antibodies against glutamic acid decarboxylase; (3) no clinical evidence of either cardiovascular or peripheral artery disease; (4) no thyroid dysfunction; (5) no alcohol or drug abuse; and (6) no pregnancy. BMI was calculated as weight divided by squared height. Hip circumference was measured over the buttocks; waist circumference was measured at the midpoint between the lower ribs and iliac crest.

*Exercise intervention cohort:* All individuals fulfilled the following inclusion criteria: (1) fasting plasma glucose  $<6.0$  mmol/l; (2) HbA<sub>1c</sub>  $<6.0\%$ ; and (3) stable weight, defined as the absence of fluctuations of  $>2\%$  of body weight for at least 3 months. In addition, the following exclusion criteria have been defined: (1) medical and family history of type 1 or type 2 diabetes; (2) medical history of hypertension or systolic blood pressure (SBP)  $>140$  mmHg and diastolic blood pressure (DBP)  $>85$  mmHg; (3) any acute or chronic inflammatory disease as determined by a leucocyte

count >8000 Gpt/l, CrP >5.0 mg/dl or clinical signs of infection; (4) clinical evidence of either cardiovascular or peripheral artery disease; (5) any type of malignant disease; (6) thyroid dysfunction; (7) Cushing's disease or hypercortisolism; (8) alcohol or drug abuse; (9) pregnancy; and (10) concomitant medication except contraceptives.

#### Determination of NAMPT enzymatic activity

For preparation of lysates,  $1 \times 10^7$  cells were resuspended in 100  $\mu$ l 0.01 mol/l NaHPO<sub>4</sub> buffer, pH 7.4, and frozen at  $-80^\circ\text{C}$  for 24 h. Cell lysates were then centrifuged at 23,000g and  $0^\circ\text{C}$  for 90 min to remove cell debris. To precipitate DNA, protamine sulphate solution (1% in NaHPO<sub>4</sub> buffer) was added to the supernatant fraction (70  $\mu$ l/ml) and samples were incubated for 15 min on ice. After centrifugation at 23,000 g and  $0^\circ\text{C}$  for 30 min aliquots of the supernatant fraction were stored at  $-80^\circ\text{C}$ . For each measurement of supernatant fraction, 6 ml of cell culture supernatant fraction were concentrated using Amicon 4Ultra columns with a molecular weight cut-off at 50 kDa (Millipore, Billerica, MA, USA). Ten microlitres of the cell lysates and concentrated supernatant fraction were transferred into 50  $\mu$ l of a reaction mix containing 50 mmol/l Tris (pH 7.4), 2 mmol/l ATP, 5 mmol/l MgCl<sub>2</sub>, 0.5 mmol/l 5-phosphoribosyl-1-pyrophosphate, and 5  $\mu$ mol/l [carbonyl-<sup>14</sup>C]nicotinamide (American Radiolabeled Chemicals, St Louis; MO, USA). Reactions were incubated for 2 h at  $37^\circ\text{C}$ . The reaction was terminated by transfer of  $2 \times 50$   $\mu$ l into tubes containing 2 ml of acetone. Production of labelled nicotinamide mononucleotide from [<sup>14</sup>C]nicotinamide was analysed by a precipitation-filtration assay. Therefore, the reaction mixture was pipetted onto acetone-pre-soaked glass microfibre filters (GF/A Ø 24 mm; Whatman, Maidstone, UK). After rinsing with  $3 \times 1$  ml acetone, filters were dried, transferred into vials with 6 ml scintillation cocktail (Betaplate Scint, PerkinElmer, Waltham, MA, USA) and radioactivity of [<sup>14</sup>C]NMN was quantified in a liquid scintillation counter (Wallac 1409 DSA, PerkinElmer). After subtraction of blank values, NAMPT activity was normalised to total protein amount.
