# Supplementary figures and images for: Leucocytes are a major source of circulating nicotinamide phosphoribosyltransferase (NAMPT)/pre-B cell colony (PBEF)/visfatin linking obesity and inflammation in humans
Source: PubMed Central journal article supplement — Diabetologia. 2011 Feb 6;54(5):1200–11. doi: 10.1007/s00125-010-2042-z (PMC3071946; doi:10.1007/s00125-010-2042-z), 2011-02-06

# Electronic supplementary material

## ESM Fig. 1

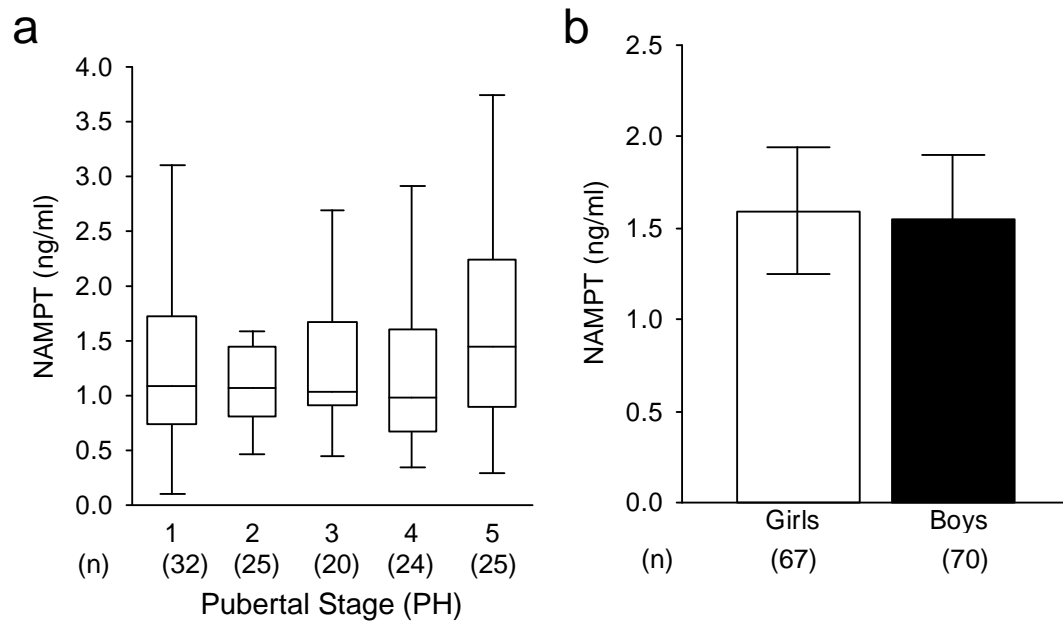

Supplement: 125_2010_2042_MOESM4_ESM.pdf [file 125_2010_2042_MOESM4_ESM.pdf]

# Electronic supplementary material

## ESM Fig. 2

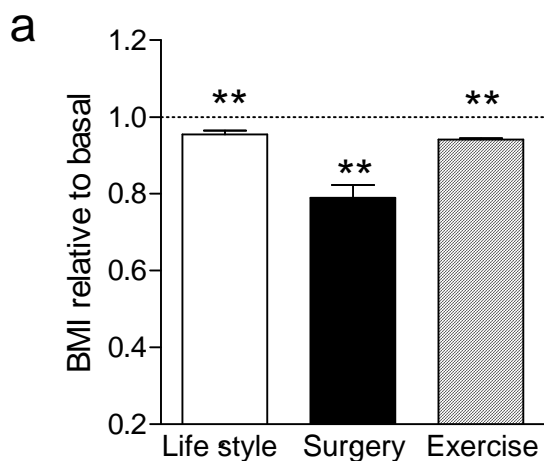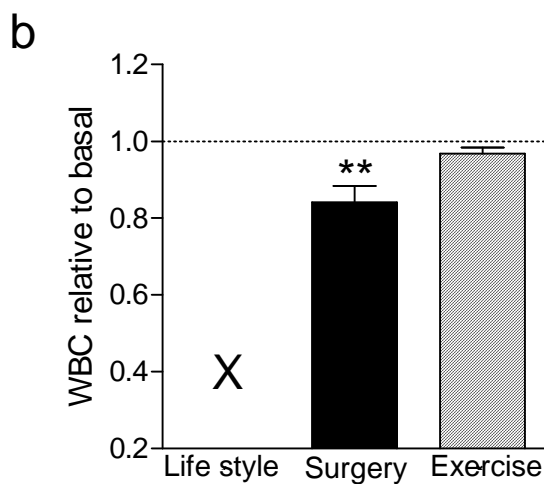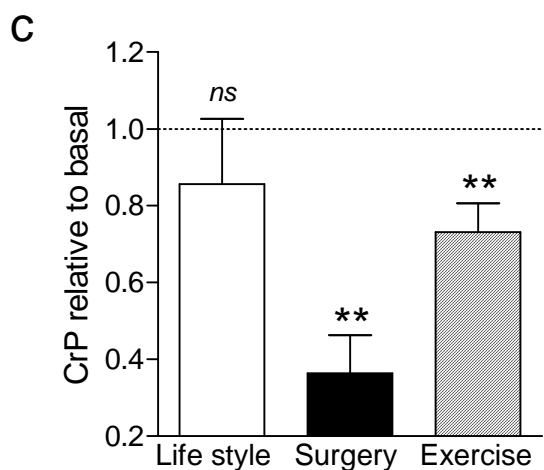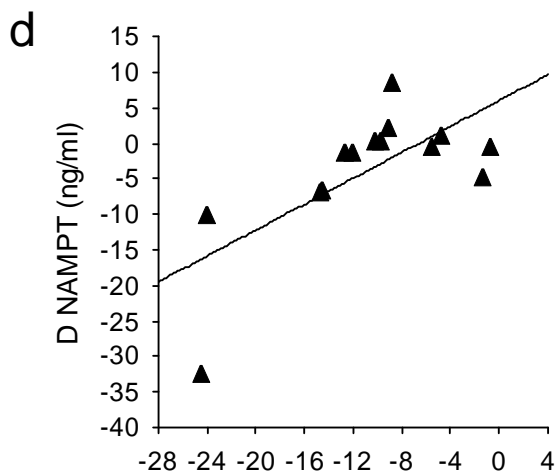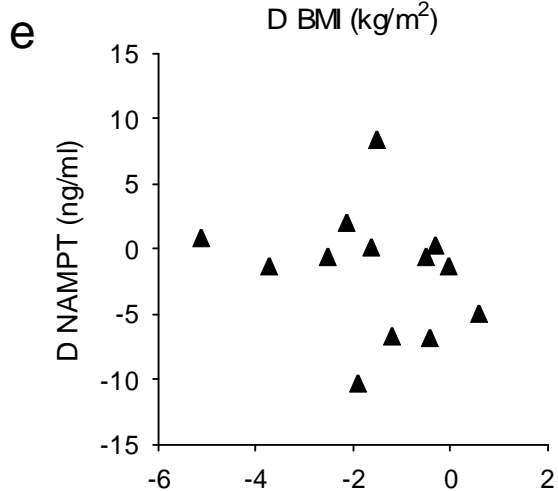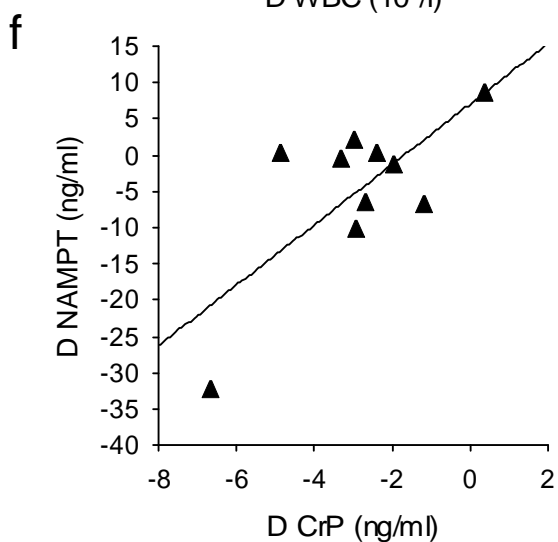

Supplement: 125_2010_2042_MOESM5_ESM.pdf [file 125_2010_2042_MOESM5_ESM.pdf]

Electronic supplementary material  
ESM Fig. 3

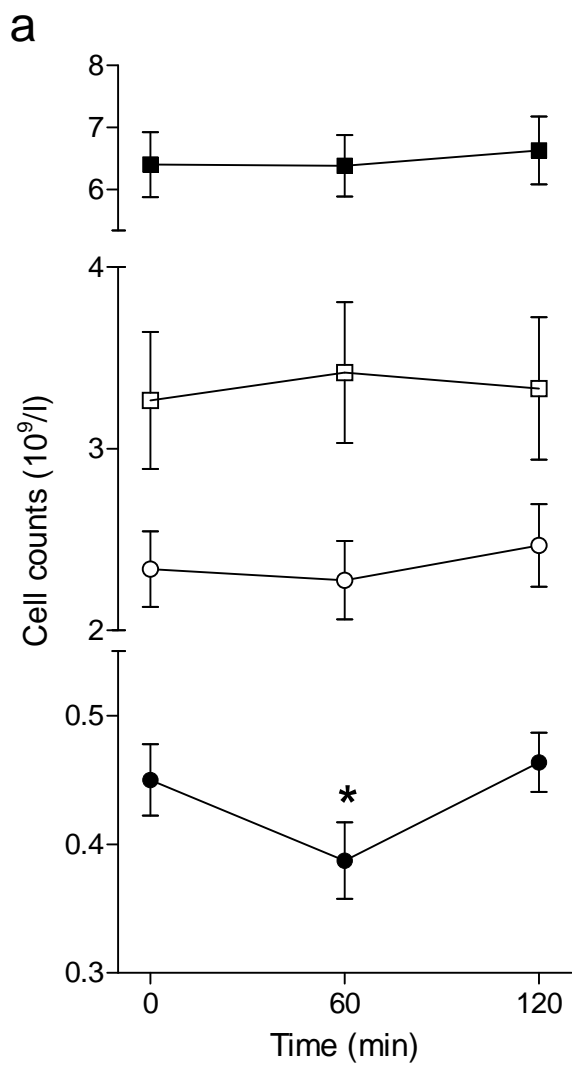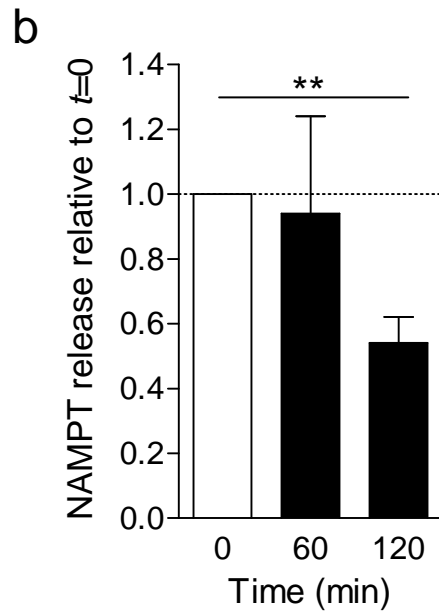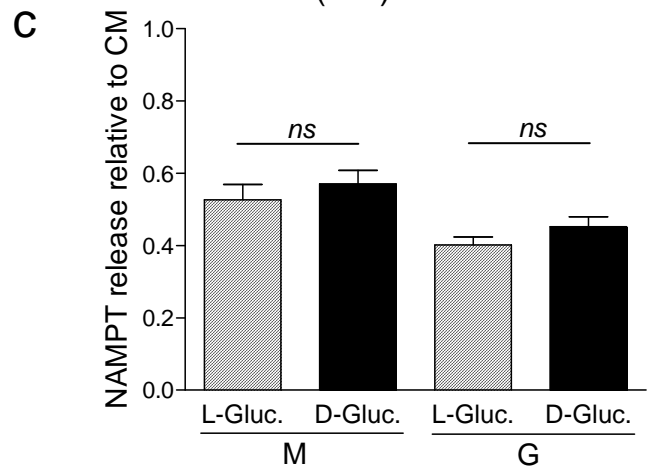

Supplement: 125_2010_2042_MOESM6_ESM.pdf [file 125_2010_2042_MOESM6_ESM.pdf]
